# Supplementary material for: Oxygen-loss in A-site deficient Sr0.85La0.10TiO3 perovskite
Source: Royal Society of Chemistry journal article supplement (doi:10.1039/c4ra04199b), 2014-01-01
Supplement: c4ra04199b1.pdf [file c4ra04199b1.pdf]

**Electronic Supplementary Material (ESI) for RSC Advances**

**Oxygen-loss in A-site deficient  $\text{Sr}_{0.85}\text{La}_{0.10}\text{TiO}_3$  perovskite**

Ipek Akin<sup>1</sup>, Ming Li<sup>2</sup>, Zhilun Lu<sup>2</sup>, Derek C. Sinclair<sup>2,\*</sup>

<sup>1</sup>Department of Metallurgical and Materials Engineering, Istanbul Technical University, Istanbul, 34469, Turkey

<sup>2</sup>Department of Materials Science & Engineering, University of Sheffield, Sheffield, S1 3JD, UK

\*Corresponding Author's e-mail: [d.c.sinclair@sheffield.ac.uk](mailto:d.c.sinclair@sheffield.ac.uk)

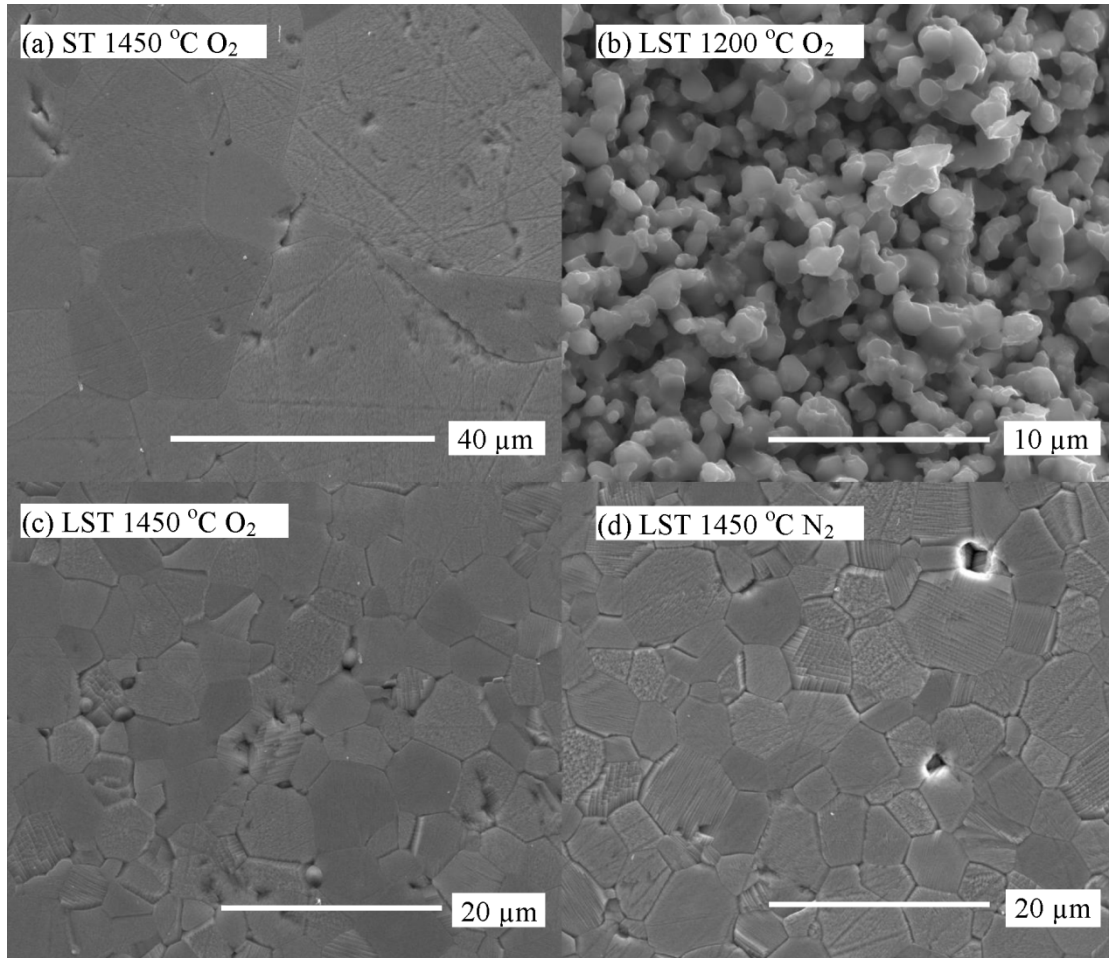

Fig. S1. SEM images of representative samples: (a) ST sintered at 1450 °C in O<sub>2</sub>, (b) LST sintered at 1200 °C in O<sub>2</sub>, (c) LST sintered at 1450 °C in O<sub>2</sub> and (d) LST sintered at 1450 °C in N<sub>2</sub>

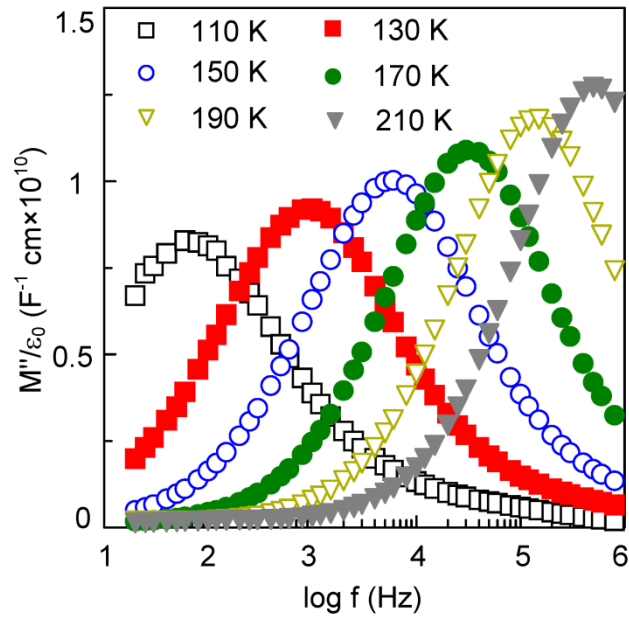

Fig S2. Imaginary components of electric modulus ( $M''$ ) spectroscopic plots for LST ceramics sintered at 1450 °C in  $O_2$ .

The magnitude of  $M''$  peak height and its temperature dependence are consistent with the bulk behavior for ST-based materials.

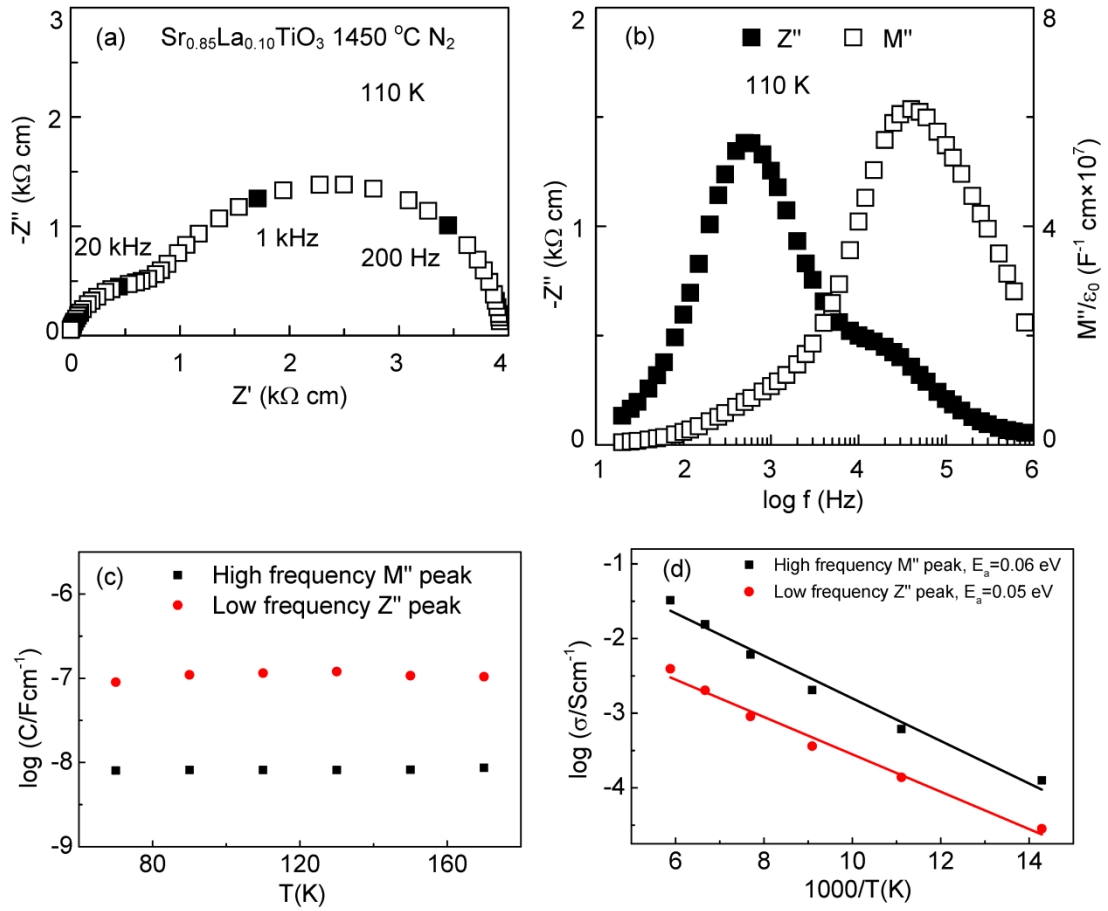

Fig S3. (a)  $Z^*$  plot at 110 K, (b) combined spectroscopic plots of the imaginary components of impedance,  $Z''$  and electric modulus,  $M''$ , at 110 K for LST ceramics sintered at 1450 °C in  $\text{N}_2$ ; (c) capacitance as a function of temperature and (d) Arrhenius-type plots of conductivity for the high and low frequency responses. The capacitance and conductivity are extracted from  $Z''/M''$  plots.

Two semiconducting components were observed in the range 70-170 K for LST ceramics sintered at 1450 °C in  $\text{N}_2$ . Both components exhibit high capacitance values ( $10^{-8}$ - $10^{-7} \text{ F cm}^{-1}$ ), suggesting neither of them is associated with a bulk response. The low frequency component is likely to be associated with a non-ohmic sample-electrode contact effect whereas the high frequency component is associated with a residual surface layer/grain boundary response.
